# Supplementary material for: Effect of Rimonabant on Glycemic Control in Insulin-Treated Type 2 Diabetes: The ARPEGGIO Trial
Source: PubMed Central journal article supplement — Diabetes Care. 2009 Dec 15;33(3):605–7. doi: 10.2337/dc09-0455 (PMC2827517; doi:10.2337/dc09-0455), 2009-12-15
Supplement: supp_dc09-0455_dc09-0455_online_appendix.pdf [file supp_dc09-0455_dc09-0455_online_appendix.pdf]

## SUPPLEMENTARY MATERIAL

**Supplementary Table 1**—Patient demographics and baseline clinical characteristics

| <b>Patient demographics</b>          | <b>Placebo<br/>(n = 187)</b> | <b>Rimonabant 20 mg<br/>(n = 179)</b> |
|--------------------------------------|------------------------------|---------------------------------------|
| Age, years                           | 58.2±10.9                    | 57.4±9.8                              |
| Gender, female/male, %               | 58.8/41.2                    | 55.3/44.7                             |
| Race, %                              |                              |                                       |
| Caucasian                            | 77.0                         | 77.1                                  |
| Black                                | 10.7                         | 8.9                                   |
| Asian                                | 7.5                          | 7.8                                   |
| Other                                | 4.8                          | 6.1                                   |
| Weight, kg                           | 95.26±20.38                  | 97.63±21.13                           |
| Height, cm                           | 166.62±9.91                  | 166.91±10.06                          |
| Body mass index, kg/m <sup>2</sup>   | 34.25±6.44                   | 34.98±6.47                            |
| Waist circumference, cm              | 110.12±14.64                 | 112.33±14.24                          |
| Time since diabetes diagnosis, years | 15.0±8.1                     | 13.7±7.3                              |
| Time since insulin initiation, years | 6.4±5.2                      | 5.9±4.6                               |
| HbA1c, %                             | 9.12±1.51                    | 9.13±1.55                             |
| FPG, mmol/l                          | 11.03±3.77                   | 11.40±3.68                            |
| Total daily insulin dose, U          | 83.46±52.57                  | 83.56±48.56                           |
| HDL-C, mmol/l                        | 1.32±0.40                    | 1.32±0.32                             |
| Triglycerides, mmol/l                | 2.69±4.09                    | 2.57±3.67                             |
| Total cholesterol, mmol/l            | 4.84±1.17                    | 5.00±1.13                             |
| LDL-C, mmol/l                        | 2.86±0.90                    | 3.03±0.96                             |
| Total:HDL-C ratio                    | 3.89±1.31                    | 3.97±1.23                             |

Data are mean±SD, unless otherwise stated.

**Supplementary Table 2**—Baseline values and changes from baseline in efficacy parameters at 48 weeks

| Parameter                                                          | Placebo<br>(n = 186) | Rimonabant 20 mg<br>(n = 179) | P-value vs.<br>placebo* |
|--------------------------------------------------------------------|----------------------|-------------------------------|-------------------------|
| <b>HbA<sub>1c</sub>, %</b>                                         |                      |                               |                         |
| Week 48                                                            | 8.85±1.48            | 8.24±1.51                     |                         |
| Change from baseline                                               | -0.24±1.13           | -0.89±1.34                    | <0.0001                 |
| <b>Proportion of patients achieving HbA<sub>1c</sub> target, %</b> |                      |                               |                         |
| <7.0%                                                              | 6.75                 | 18.40                         | 0.0012                  |
| <6.5%                                                              | 1.23                 | 8.55                          | 0.002                   |
| <b>FPG, mmol/l</b>                                                 |                      |                               |                         |
| Week 48                                                            | 10.33±3.89           | 9.75±3.69                     |                         |
| Change from baseline                                               | -0.63±3.74           | -1.85±3.82                    | 0.0193                  |
| <b>Total daily insulin dose, U</b>                                 |                      |                               |                         |
| Week 48                                                            | 83.06±53.01          | 80.85±47.55                   |                         |
| Change from baseline                                               | 0.21±6.87            | -2.71±8.57                    | 0.0004                  |
| <b>Proportion of patients receiving rescue medication, %</b>       | 34.9                 | 14.0                          | <0.0001                 |
| <b>HDL-C, mmol/l</b>                                               |                      |                               |                         |
| Week 48                                                            | 1.21±0.34            | 1.36±0.37                     |                         |
| % change from baseline                                             | -7.14±13.39          | 3.14±13.49                    | <0.0001                 |
| <b>Triglycerides, mmol/l</b>                                       |                      |                               |                         |
| Week 48                                                            | 2.24±1.50            | 2.07±1.66                     |                         |
| % change from baseline                                             | 7.64±40.58           | -3.99±52.99                   | 0.0235                  |
| <b>Total cholesterol, mmol/l</b>                                   |                      |                               |                         |
| Week 48                                                            | 4.78±1.13            | 5.06±1.14                     |                         |
| % change from baseline                                             | 0.50±16.81           | 2.14±19.18                    | 0.0888                  |
| <b>LDL-C, mmol/l</b>                                               |                      |                               |                         |
| Week 48                                                            | 2.82±0.91            | 3.00±0.96                     |                         |
| % change from baseline                                             | 3.68±37.21           | 1.77±26.32                    | 0.6759                  |
| <b>Total-cholesterol:HDL-C ratio</b>                               |                      |                               |                         |
| Week 48                                                            | 4.21±1.45            | 4.00±1.42                     |                         |
| Change from baseline                                               | 0.38±0.96            | -0.01±0.98                    | 0.0012                  |
| <b>Body weight, kg</b>                                             |                      |                               |                         |
| Week 48                                                            | 95.43±20.33          | 94.89±20.28                   |                         |
| Change from baseline                                               | 0.13±3.46            | -2.49±4.01                    | <0.0001                 |
| <b>Waist circumference, cm</b>                                     |                      |                               |                         |
| Week 48                                                            | 109.96±14.37         | 109.29±13.42                  |                         |
| Change from baseline                                               | -0.33±4.23           | -2.95±5.47                    | <0.0001                 |

\*Least squares mean difference; data are mean±SD changes from baseline.

**Supplementary Table 3**—Patients treated for hypertension and breakdown of class of medications

|                                               | <b>Placebo<br/>(N=187)</b> | <b>Rimonabant 20 mg<br/>(N=179)</b> |
|-----------------------------------------------|----------------------------|-------------------------------------|
| Any concomitant medications for hypertension  | 152 (81.3%)                | 129 (72.1%)                         |
| Agents acting on the renin-angiotensin system | 134 (71.7%)                | 112 (62.6%)                         |
| Diuretics                                     | 58 (31.0%)                 | 57 (31.8%)                          |
| Beta blocking agents                          | 48 (25.7%)                 | 50 (27.9%)                          |
| Calcium channel blockers                      | 44 (23.5%)                 | 50 (27.9%)                          |
| Antihypertensives                             | 7 (3.7%)                   | 11 (6.1%)                           |

**Supplementary Table 4**—Percentage of patients treated for lipid disorder

|                        | <b>Placebo<br/>(N=187)</b> | <b>Rimonabant 20 mg<br/>(N=179)</b> |
|------------------------|----------------------------|-------------------------------------|
| Lipid modifying agents | 111 (59.4%)                | 97 (54.2%)                          |

**Supplementary Table 5**—Percentage of patients receiving rescue medication

| <b>Rescue medication</b>  | <b>Placebo (N=186)</b> | <b>Rimonabant 20 mg<br/>(N=179)</b> | <b>P-value</b> |
|---------------------------|------------------------|-------------------------------------|----------------|
| Any time during the study |                        |                                     |                |
| Yes                       | 65 (34.9%)             | 25 (14.0%)                          | <0.0001        |
| No                        | 121 (65.1%)            | 154 (86.0%)                         |                |

**Supplementary Table 6**—Percentage of patients having insulin dose increase and or oral agents

| <b>Rescue medication</b>       | <b>Placebo<br/>(N=186)</b> | <b>Rimonabant 20 mg<br/>(N=179)</b> |
|--------------------------------|----------------------------|-------------------------------------|
|                                | 186 (100%)                 | 179 (100%)                          |
| Yes                            | 65 (34.9%)                 | 25 (14.0%)                          |
| Insulin dose increase          | 57 (30.6%)                 | 23 (12.8%)                          |
| Other anti-diabetic agents use | 9 (4.8%)                   | 2 (1.1%)                            |
| No                             | 121 (65.1%)                | 154 (86%)                           |

**Supplementary Table 7**—Day of initiation of rescue medication

| <b>Patients with introduction of rescue medication</b> | <b>Placebo<br/>(N=186)</b> | <b>Rimonabant 20 mg<br/>(N=179)</b> |
|--------------------------------------------------------|----------------------------|-------------------------------------|
| Day 1 - Day 28                                         | 8 (4.3%)                   | 3 (1.7%)                            |
| Day 29 - Day 56                                        | 4 (2.2%)                   | 3 (1.7%)                            |
| Day 57 - Day 84                                        | 4 (2.2%)                   | 4 (2.2%)                            |
| Day 85 - Day 168                                       | 22 (11.8%)                 | 4 (2.2%)                            |
| Day 169 - Day 252                                      | 17 (9.1%)                  | 3 (1.7%)                            |
| Day 253 - Day 336                                      | 9 (4.8%)                   | 7 (3.9%)                            |
| > Day 336                                              | 1 (0.5%)                   | 1 (0.6%)                            |

**Supplementary Table 8**—Overall incidence of treatment-emergent adverse

events (TEAEs), serious TEAEs, TEAEs leading to discontinuation, and commonly reported TEAEs

|                                                                                                  | Placebo<br>(n = 187) | Rimonabant 20 mg<br>(n = 179) |
|--------------------------------------------------------------------------------------------------|----------------------|-------------------------------|
| <b>Overall (N [%])</b>                                                                           |                      |                               |
| Patients with any TEAE                                                                           | 160 (85.6)           | 157 (87.7)                    |
| Patients with any serious TEAE                                                                   | 36 (19.3)            | 30 (16.8)                     |
| Death                                                                                            | 2 (1.1)              | 0                             |
| Patients with any TEAE leading to discontinuation                                                | 15 (8.0)             | 31 (17.3)                     |
| <b>Serious TEAEs that occurred in ≥1 of the rimonabant group</b>                                 |                      |                               |
| Metabolism and nutritional disorders                                                             | 3 (1.6)              | 4 (2.2)                       |
| Hypoglycemia                                                                                     | 2 (1.1)              | 4 (2.2)                       |
| Psychiatric disorders                                                                            | 2 (1.1)              | 4 (2.2)                       |
| Depression                                                                                       | 2 (1.1)              | 2 (1.1)                       |
| Post-traumatic stress disorder                                                                   | 0                    | 1 (0.6)                       |
| Suicide ideation                                                                                 | 0                    | 1 (0.6)                       |
| Nervous system disorders                                                                         | 5 (2.7)              | 4 (2.2)                       |
| Cerebral ischemia                                                                                | 0                    | 1 (0.6)                       |
| Ischemic stroke                                                                                  | 0                    | 1 (0.6)                       |
| Loss of consciousness                                                                            | 0                    | 1 (0.6)                       |
| Presyncope                                                                                       | 0                    | 1 (0.6)                       |
| <b>TEAEs that led to study discontinuation in ≥1% of any treatment group (N [%])<sup>a</sup></b> |                      |                               |
| Psychiatric disorders                                                                            | 2 (1.1)              | 15 (8.4)                      |
| Anxiety                                                                                          | 0                    | 5 (2.8)                       |
| Depression                                                                                       | 2 (1.1)              | 4 (2.2)                       |
| Insomnia                                                                                         | 0                    | 3 (1.7)                       |
| Depressed mood                                                                                   | 0                    | 2 (1.1)                       |
| Middle insomnia                                                                                  | 0                    | 2 (1.1)                       |
| Gastrointestinal disorders                                                                       | 2 (1.1)              | 9 (5.0)                       |
| Nausea                                                                                           | 0                    | 5 (2.8)                       |
| Nervous system disorders                                                                         | 3 (1.6)              | 8 (4.5)                       |
| Dizziness                                                                                        | 1 (0.5)              | 2 (1.1)                       |
| General disorders and admin site conditions                                                      | 0                    | 4 (2.2)                       |
| Asthenia                                                                                         | 0                    | 2 (1.1)                       |
| <b>TEAEs that occurred in ≥2% of patients receiving rimonabant 20 mg (N [%])</b>                 |                      |                               |
| Hypoglycemia                                                                                     | 88 (47.1)            | 101 (56.4)                    |
| Anxiety                                                                                          | 10 (5.3)             | 25 (14.0)                     |
| Nausea                                                                                           | 3 (1.6)              | 20 (11.2)                     |
| Depression                                                                                       | 8 (4.3)              | 18 (10.1)                     |
| Dizziness                                                                                        | 15 (8.0)             | 18 (10.1)                     |
| Insomnia                                                                                         | 6 (3.2)              | 14 (7.8)                      |
| Diarrhea                                                                                         | 12 (6.4)             | 13 (7.3)                      |
| Influenza                                                                                        | 20 (10.7)            | 13 (7.3)                      |
| Paresthesia                                                                                      | 9 (4.8)              | 12 (6.7)                      |
| Nasopharyngitis                                                                                  | 8 (4.3)              | 10 (5.6)                      |

|                                   |          |         |
|-----------------------------------|----------|---------|
| Headache                          | 18 (9.6) | 9 (5.0) |
| Fall                              | 7 (3.7)  | 8 (4.5) |
| Depressed mood                    | 6 (3.2)  | 7 (3.9) |
| Gastroenteritis                   | 4 (2.1)  | 7 (3.9) |
| Vomiting                          | 7 (3.7)  | 7 (3.9) |
| Bronchitis                        | 9 (4.8)  | 6 (3.4) |
| Asthenia                          | 4 (2.1)  | 5 (2.8) |
| Back pain                         | 7 (3.7)  | 5 (2.8) |
| Fatigue                           | 2 (1.1)  | 5 (2.8) |
| Hyperhidrosis                     | 5 (2.7)  | 5 (2.8) |
| Muscular weakness                 | 3 (1.6)  | 5 (2.8) |
| Neuropathy peripheral             | 0        | 5 (2.8) |
| Pain in extremity                 | 3 (1.6)  | 5 (2.8) |
| Sinusitis                         | 6 (3.2)  | 5 (2.8) |
| Muscle spasms                     | 2 (1.1)  | 4 (2.2) |
| Panic attack                      | 1 (0.5)  | 4 (2.2) |
| Skin ulcer                        | 0        | 4 (2.2) |
| Upper respiratory tract infection | 10 (5.3) | 4 (2.2) |
| Vision blurred                    | 6 (3.2)  | 4 (2.2) |

---

<sup>a</sup>By system organ class and preferred term.

## **Supplementary Appendix: Scripted neurological and psychiatric questions**

### ***Neurological questions:***

Since the last visit:

1. Have you had any loss of consciousness?
2. Have you had any dizziness or lightheadedness?
3. Have you had any problems seeing?
4. Have you had any problems hearing?
5. Have you had any problems with your ability to smell things?
6. Have you had any problems with your ability to taste things?
7. Have you had any problems with your ability to speak?
8. Have you had any trouble swallowing?
9. Have you had any problems with general movement?
10. Have you had any weakness of your arms or legs?
11. Have you had any numbness or tingling?
12. Have you had any problems walking?
13. Have you had any problems with your balance or coordination?

### ***Psychiatric questions:***

Since the last visit:

1. Have you had trouble falling or staying asleep, or have you awoken too early in the morning?
2. Have you been worried excessively or been anxious about several things?
3. Have you had spells or attacks when you suddenly felt anxious, frightened, or uneasy in situations where most people would not feel that way?
4. Have you had unexplained heart rate increase, sweating, or feelings of coming danger?
5. Have you felt sad, low, or depressed?
6. Have you felt a loss of energy or interest in your daily activities?

In case one or more of the above-mentioned questions is positive, add the following question:

7. Have you thought that life was not worth living or have you had urges to hurt yourself?
